# Supplementary material for: Determination of the Aspect-ratio Distribution of Gold Nanorods in a Colloidal Solution using UV-visible absorption spectroscopy
Source: PubMed Central journal article supplement (PMC6877556; doi:10.1038/s41598-019-53621-4), 2019-11-25
Supplement: 41598_2019_53621_MOESM1_ESM.pdf [file 41598_2019_53621_MOESM1_ESM.pdf]

# Determination of the Aspect-ratio Distribution of Gold Nanorods in a Colloidal Solution using UV-visible absorption spectroscopy

Rahul Kumar<sup>1,\*</sup>, Leonardo Binetti<sup>2</sup>, Hien T Nguyen<sup>1</sup>, Lourdes S M Alwis<sup>2</sup>, Arti Agrawal<sup>3</sup>, Tong Sun<sup>1</sup>, and Kenneth T V Grattan<sup>1</sup>

<sup>1</sup>School of Mathematics, Computer Science & Engineering, City, University of London, London, EC1V 0HB, United Kingdom

<sup>2</sup>Edinburg Napier University, School of Engineering and the Built Environment, Edinburgh, EH11 4BN, Edinburgh, United Kingdom

<sup>3</sup>Department of Engineering and Information Technology, University of Technology Sydney, 15 Broadway, Ultimo NSW 2007, Australia

\*Rahul.Kumar@city.ac.uk

Supplementary Material:

Figure:

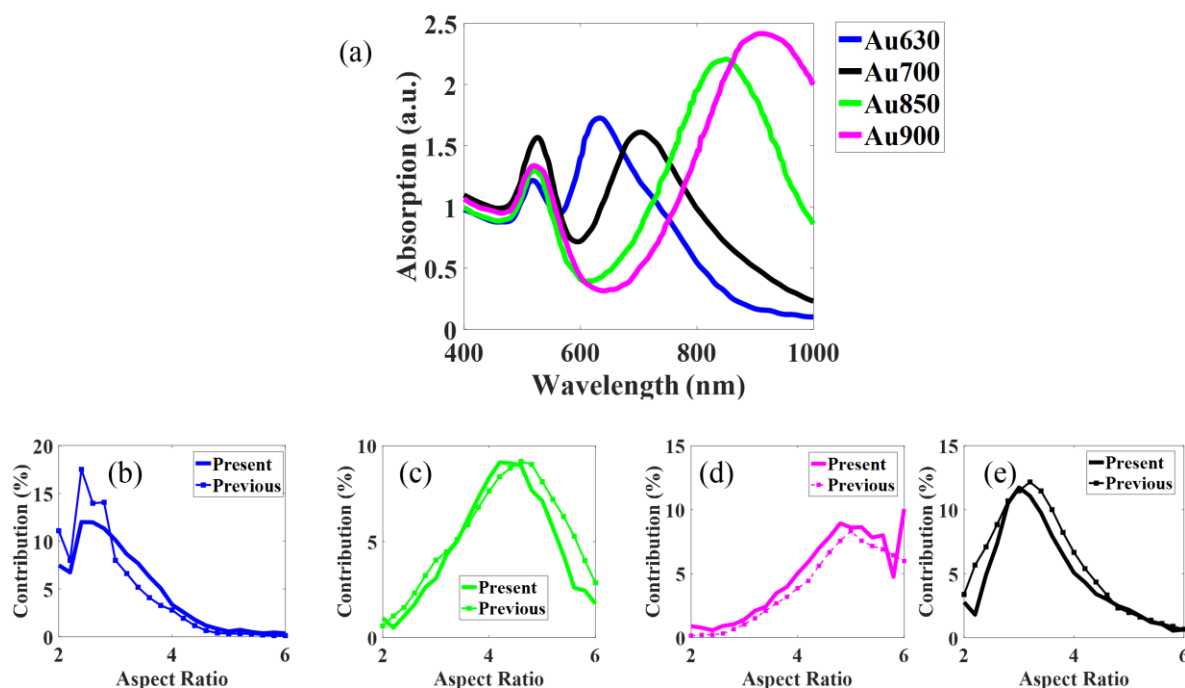

**Figure 1:** (a) The UV-visible spectra extracted from the work of Eustin & Sayed<sup>1</sup>. (b)-(e) Comparison of AR distribution obtained from the algorithm developed in present work with the one reported previously in reference [1].

## Source-Code (written in MATLAB<sup>2</sup>):

```
close all; clc;clearvars;
```

```
%%%%%%%% Reading exp. value of RI from Johnson & Christy (1972) given at the end of program
```

```
experimental_refractive_index = data_john_christy();  
wavelength_john = experimental_refractive_index (:,1);  
n_exp = experimental_refractive_index (:,2);  
k_exp = experimental_refractive_index (:,3);
```

```
%%% reading experimental UV-Vis values from external file
```

```
filename = 'example.Sample'; %%% UV_VIS spectrum file name (without header):  
filename = [filename '.csv']; %%% UV-Vis file format (wavelength, Absorption (nm))  
UV_Vis_data_exp = load (filename);
```

```
% finding row number corresponding to wavelength 400 nm, 617 nm & 1000
```

```
...wavelength_index is a subroutine, whose body is defined in the end
```

```
index_400 = wavelength_index(UV_Vis_data_exp (:,1),400);  
index_618 = wavelength_index(UV_Vis_data_exp (:,1),618);  
index_1000 = wavelength_index(UV_Vis_data_exp (:,1),1000);
```

```
%extracting data from UV-VIS spectrum file
```

```
%LR stands for Longitudinal Resonance
```

```
absorb_exp_LR = UV_Vis_data_exp (index_1000:index_618,2);  
absorb_exp1_normalized = absorb_exp_LR./max(absorb_exp_LR);  
absorb_exp_complete_spectrum_normalized = UV_Vis_data_exp  
(index_1000:index_400,2)./max(UV_Vis_data_exp (index_1000:index_400,2));  
lambda_complete = UV_Vis_data_exp (index_1000:index_400,1); %% lambda = 400 nm to 1000 nm  
lambda_LR = UV_Vis_data_exp (index_1000:index_618,1);  
len_lambda = length(lambda_LR);
```

```
%interpolation of experimental refractive index data over 300 to 900 at step of 1
```

```
ref_real_interpolated = interp1(wavelength_john, n_exp,lambda_LR,'spline');  
ref_imag_interpolated = interp1(wavelength_john, k_exp,lambda_LR,'spline');
```

```
%calculating relative permittivity from interpolated refractive index data
```

```
epsilon_exp_complete = (ref_real_interpolated+1i.*ref_imag_interpolated).^2;  
epsilon_real_interpolated = real(epsilon_exp_complete);  
epsilon_imag_interpolated = imag(epsilon_exp_complete);
```

```
%%%%%%%%% Applying Gans theory %%%%%%%%%%
```

```
AR = 2 : 0.2 : 6;
```

```
epsilon_medium = 1.77:0.05:2.1;
```

```
Absob_coff_transpose = zeros(length(AR),length(lambda_LR));
```

```
Absob_coff_transpose_normalized = zeros(length(AR),length(lambda_LR)); %% Normalized
```

### Absorption Coefficient

```
N = 1; % Initial contribution
V = 1; %volume
% Loop to find AR and Epsilon_medium having minimum Summed Square Error %%%
% Refer main paper for algorithm
for k = 1:length(epsilon_medium)
    for i = 1:length(AR)
        elong = sqrt (1-(1/(AR(i)^2)));
        PA = ((1-elong^2)/elong^2)*(1./(2*elong)* log ((1+elong)/(1-elong))-1);
        PB = (1-PA)/2;
        PC = PB;
        coeff_A = ((1/PA^2).*epsilon_imag_interpolated)./(epsilon_real_interpolated + ((1-PA)/PA)*epsilon_medium(k)).^2 + epsilon_imag_interpolated.^2);
        coeff_B = ((1/PB^2).*epsilon_imag_interpolated)./(epsilon_real_interpolated + ((1-PB)/PB)*epsilon_medium(k)).^2 + epsilon_imag_interpolated.^2);
        coeff_C = coeff_B;
        Absob_coff_transpose (i,:) = (2*pi*N*V*(epsilon_medium(k))^(3/2))./(3.*lambda_LR)
        .*(coeff_A + coeff_B + coeff_C);
        Absob_coff_transpose_normalized (i,:) = Absob_coff_transpose (i,:) ./
        max(Absob_coff_transpose (i,:));
    end
    Absob_coff_norm = transpose(Absob_coff_transpose_normalized);
    factor = 0:0.001:1;
    absorb_exp1_norm_new = absorb_exp1_normalized;
    for i = 1:(length(AR))
        if (i<length(AR))
            trun_coff = Absob_coff_norm(:,i+1:length(AR));
        else
            trun_coff = Absob_coff_norm(:,length(AR));
        end
        trun_coff_tran = transpose (trun_coff);
        factor_1 = factor .* Absob_coff_norm(:,i);

        for j = 1:length(factor)
            absorb_exp1_norm_new_1 = absorb_exp1_norm_new-factor_1(:,j);
            if (i<length(AR))
                P1=(trun_coff_tran*trun_coff)\trun_coff_tran;
                error_value_1 = P1*absorb_exp1_norm_new_1;
                error_value = trun_coff*error_value_1;
            else
                absorb_exp1_norm_new_1 = absorb_exp1_norm_new;
                error_value = factor_1(:,j);
            end
            SSE(i,j) = transpose(absorb_exp1_norm_new_1-error_value)*(absorb_exp1_norm_new_1-
            error_value);
        end
        [min_SSE,min_index] = min(SSE(i,:));
        freq(k,i,1)= factor(min_index);
        absorb_exp1_norm_new = absorb_exp1_norm_new-factor_1(:,min_index);
    end
    fitted_curve= Absob_coff_norm * transpose(freq(k,:));
    error_final = absorb_exp1_normalized-fitted_curve;
    SSE_final(k) = transpose(error_final)*(error_final);
end
[min_SSE_eps,min_index_eps] = min(SSE_final);
epsilon_minimum = epsilon_medium(min_index_eps);
```

```

%% for plotting complete curve i.e lambda = 400 nm to 1000 nm

%interpolation of experimental epsilon data over 300 to 900 at step of 1
ref_real_interpolated = interp1(wavelength_john, n_exp, lambda_complete, 'spline');
ref_imag_interpolated = interp1(wavelength_john, k_exp, lambda_complete, 'spline');

%calculating relative permittivity from ref. index data
epsilon_exp_complete = (ref_real_interpolated+1i.*ref_imag_interpolated).^2;
epsilon_real_interpolated = real(epsilon_exp_complete);
epsilon_imag_interpolated = imag(epsilon_exp_complete);

% initialization corresponding to complete lambda
Absob_coff_transpose = zeros(length(AR),length(lambda_complete));
Absob_coff_transpose_normalized = zeros(length(AR),length(lambda_complete));

% Calculating complete UV-Vis form fitted contribution

for i = 1:length(AR)
    elong = sqrt (1-(1/(AR(i)^2)));
    PA = ((1-elong^2)/elong^2)*(1./(2*elong)* log ((1+elong)/(1-elong))-1);
    PB = (1-PA)/2;
    PC = PB;
    coff_A = ((1/PA^2).*epsilon_imag_interpolated)./((epsilon_real_interpolated + ((1-PA)/PA)*epsilon_medium(min_index_eps)).^2 + epsilon_imag_interpolated.^2);
    coff_B = ((1/PB^2).*epsilon_imag_interpolated)./((epsilon_real_interpolated + ((1-PB)/PB)*epsilon_medium(min_index_eps)).^2 + epsilon_imag_interpolated.^2);
    coff_C = coff_B;
    Absob_coff_transpose (i,:) =
(2*pi*N*v*(epsilon_medium(min_index_eps))^(3/2))./(3.*lambda_complete) .*(coff_A + coff_B +
coff_C);
    Absob_coff_transpose_normalized (i,:) = Absob_coff_transpose (i,:) ./
max(Absob_coff_transpose (i,:));
end

Absob_coff_norm = transpose(Absob_coff_transpose_normalized);
fitted_curve_1= Absob_coff_norm * transpose(freq(min_index_eps,:));

% calculating mean & standard deviation
mean = round(sum(AR.*freq(min_index_eps,:))/sum(freq(min_index_eps,:),1),1);
variance_sum = (freq(min_index_eps,:).*(AR-mean).^2);
std_deviation = round(sqrt(sum(variance_sum)/sum(freq(min_index_eps,:))),1);

%% plotting figures

% plotting uv-vis spectrum
figure ();
p = plot (lambda_complete,absorb_exp_complete_spectrum_normalized,lambda_complete,
fitted_curve_1,'Linewidth',6);
p(1).LineStyle = '-';
p(1).Linewidth = 6;
p(1).Color = '[0,0,1]';
p(2).LineStyle = '--';
p(2).Linewidth = 6;
p(2).Color = '[1,0,0]';
set ( gca , 'FontSize' , 30 , 'fontweight' , 'b' , 'FontName' , 'Times New Roman' ) ;

```

```

xlabel ( 'wavelength (nm)' , 'FontSize' , 30 , 'fontweight' , 'b' , 'FontName' , 'Times New Roman' ) ;
ylabel ( 'Absorption (a.u.)' , 'FontSize' , 30 , 'fontweight' , 'b' , 'FontName' , 'Times New Roman' ) ;
legend ( 'Experimental' , 'Fitted Curve' ) ;
xlim([400,1000]);
dimension = [0.2 0.5 0.3 0.3];
str = {'SSE:', num2str(min_SSE_eps)};
annotation('textbox',dimension,'String',str,'FitBoxToText','on','FontSize' , 20 ,
'fontweight' , 'b' , 'FontName' , 'Times New Roman');

```

```

% plotting contribution

```

```

figure();
p = plot (AR, (freq(min_index_eps, :)/sum(freq(min_index_eps, :)))*100);
p(1).LineStyle = '--';
p(1).Linewidth = 2;
p(1).Color = '[0,0,1]';
p(1).Marker = 'o';
p(1).MarkerSize = 10;
p(1).MarkerEdgeColor = '[0,0,1]';
p(1).MarkerFaceColor = '[0,0,1]';
set ( gca , 'FontSize' , 30 , 'fontweight' , 'b' , 'FontName' , 'Times New Roman' ) ;
xlabel ( 'Aspect Ratio' , 'FontSize' , 30 , 'fontweight' , 'b' , 'FontName' , 'Times New Roman' ) ;
ylabel ( 'Contribution (%)' , 'FontSize' , 30 , 'fontweight' , 'b' , 'FontName' , 'Times New Roman' ) ;
dimension = [0.2 0.5 0.3 0.3];
str = {'\mu / \sigma:', num2str(mean) num2str(std_deviation)};
annotation('textbox',dimension,'String',str,'FitBoxToText','on','FontSize' , 20 ,
'fontweight' , 'b' , 'FontName' , 'Times New Roman');

```

```

%%%% Gold refractive index were taken from following reference

```

```

% P.B. Johnson and R.W. Christy, "Optical constants of the noble metals," Phys. Rev. B, vol.
6, pp. 4370, 1972.

```

```

% Data format [wavelength (nm), real (refractive index), img (refractive_index)]

```

```

function y = data_john_christy()

```

```

y = [983.968254      0.22      6.350
      891.942446  0.17      5.663
      821.0596026  0.16      5.083
      755.9756098  0.14      4.542
      704.4318182  0.13      4.103
      659.4680851  0.14      3.697
      616.8159204  0.21      3.272
      582.0657277  0.29      2.863
      548.5840708  0.43      2.455
      520.9243697  0.62      2.081
      495.9200000  1.04      1.833
      471.4068441  1.31      1.849
      450.8363636  1.38      1.914
      430.4861111  1.45      1.948
      413.2666667  1.46      1.958
      397.3717949  1.47      1.952

```

```

381.4769231    1.46    1.933
367.8931751    1.48    1.895
354.2285714    1.5     1.866
342.4861878    1.48    1.871
331.4973262    1.48    1.883
320.3617571    1.54    1.898
310.726817 1.53    1.893
300.9223301    1.53    1.889
292.4056604    1.49    1.878];
end

% wavelength subroutine Body
function y = wavelength_index(wavelen, wave)
[~, index_400] = min (abs(wavelen(:,1)-wave));
y = index_400;
end

```

## Reference:

- [1] Eustis, S. & El-Sayed, M. A. Determination of the aspect ratio statistical distribution of gold nanorods in solution from a theoretical fit of the observed inhomogeneously broadened longitudinal plasmon resonance absorption spectrum. *J. Appl. Phys.* **100**, 044324 (2006).
- [2] The Mathworks, Inc., Natick, Massachusetts. MATLAB version 9.1.0.441655 (R2016b) (2016).
